# Supplementary material
Source: Springer Nature journal article supplement (https://www.springermedizin.de/resource/supplementary/13063_2009_360_MOESM1_ESM.pdf/9618064)
Supplement: MOESM1 [file 9618064]

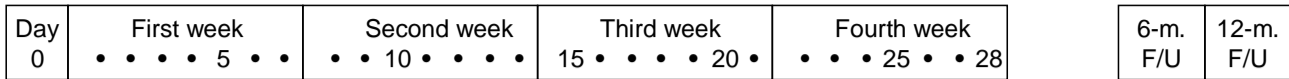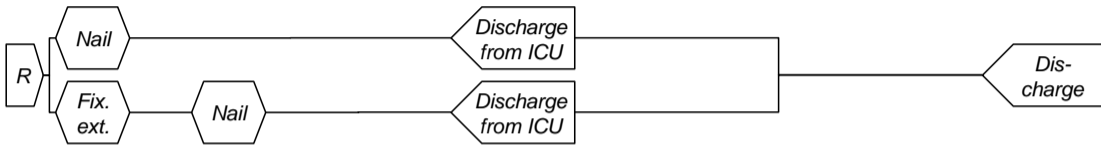

|                            |          |                      |                      |                             |                             |                        |          |          |  |  |  |  |  |  |  |  |  |  |  |
|----------------------------|----------|----------------------|----------------------|-----------------------------|-----------------------------|------------------------|----------|----------|--|--|--|--|--|--|--|--|--|--|--|
| Elegibility and consent    | <b>X</b> |                      |                      |                             |                             |                        |          |          |  |  |  |  |  |  |  |  |  |  |  |
| ICU data recording         | <b>X</b> | <b>X X X X X X X</b> | <b>X X X X X X X</b> | <b>X* X* X* X* X* X* X*</b> | <b>X* X* X* X* X* X* X*</b> | <i>as available</i>    | <b>X</b> | <b>X</b> |  |  |  |  |  |  |  |  |  |  |  |
| Clinical data recording    | <b>X</b> | <b>X X X X X X X</b> | <b>X X X X X X X</b> | <b>X X X X X X X</b>        | <b>X X X X X X X</b>        | <i>until discharge</i> | <b>X</b> | <b>X</b> |  |  |  |  |  |  |  |  |  |  |  |
| Laboratory parameters      | <b>X</b> | <b>X X X X X X X</b> | <b>X X X X X X X</b> | <b>X* X* X* X* X* X* X*</b> | <b>X* X* X* X* X* X* X*</b> | <i>as available</i>    | <b>X</b> | <b>X</b> |  |  |  |  |  |  |  |  |  |  |  |
| Immunology sampling        | <b>X</b> | <b>X X X X X X X</b> | <b>X</b>             | <b>X</b>                    |                             |                        |          | <b>X</b> |  |  |  |  |  |  |  |  |  |  |  |
| Quality of life assessment |          |                      |                      |                             |                             |                        | <b>X</b> | <b>X</b> |  |  |  |  |  |  |  |  |  |  |  |
